# Supplementary material for: Evaluating the Diagnostic Potential of Combined Salivary and Skin Biomarkers in Parkinson’s Disease
Source: MDPI journal article supplement (doi:10.3390/ijms25094823), 2024-04-28
Supplement: s1 [file s1]

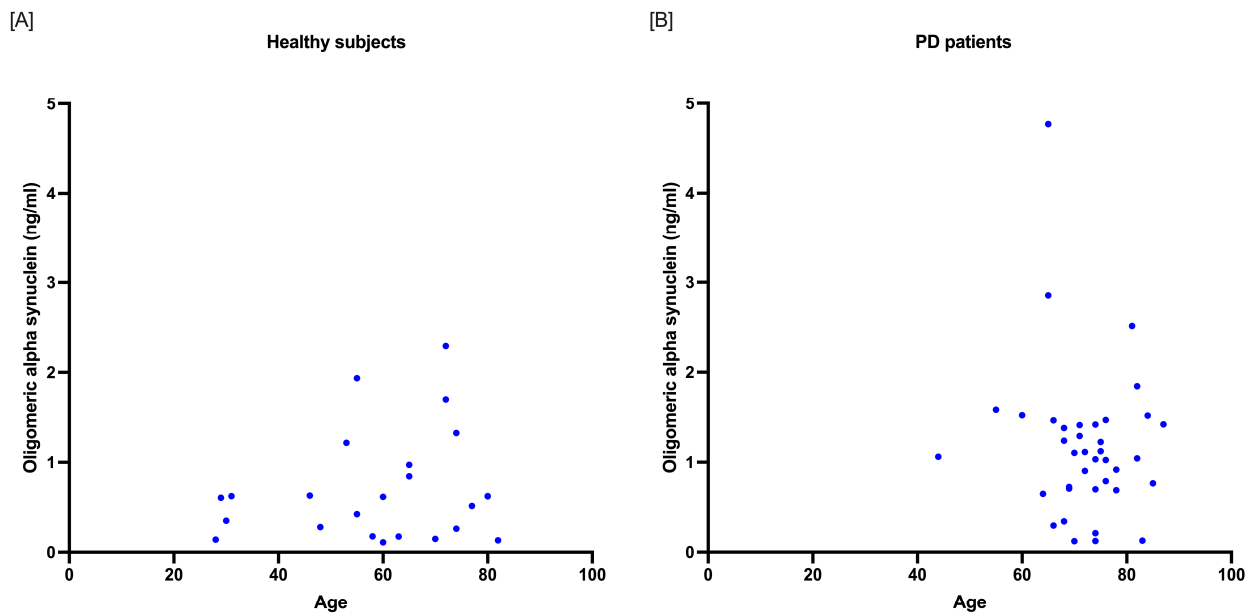

**Figure S1.** Relationship between salivary oligomeric alpha synuclein (expressed in ng/ml) and age in healthy subjects (A) and PD patients (B)

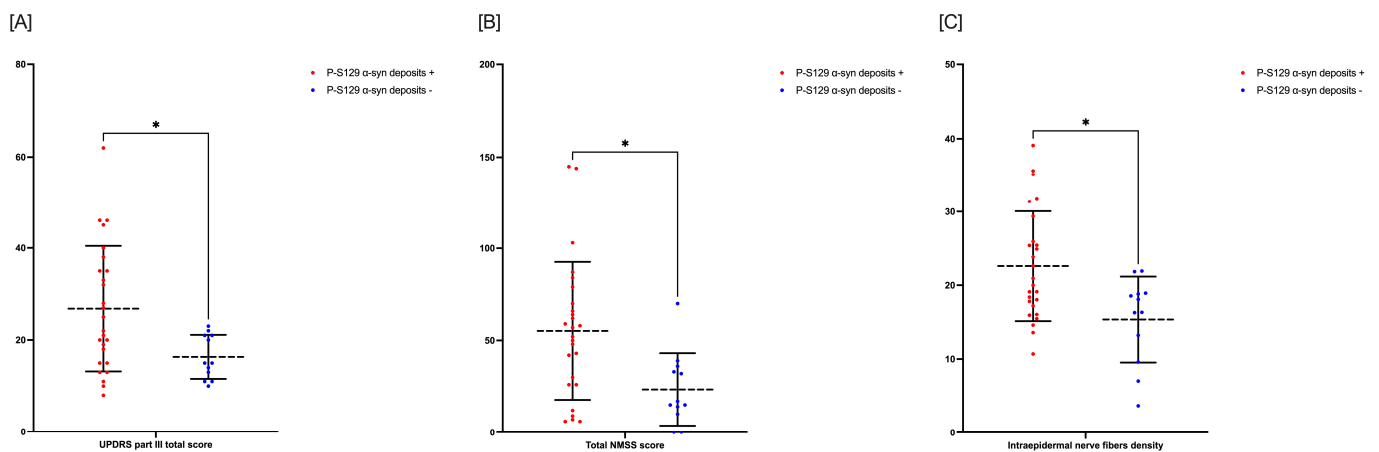

**Figure S2.** Comparison between PD patients who exhibit deposits of p-S129 alpha synuclein in the skin and those without such deposits in terms of total score on the MDS-UPDRS (A), NMSS (B) and intraepidermal nerve fibre density (C). Mean values (dotted lines) and standard deviations (error bars) are shown in the figure. The asterisk (\*) indicates statistical significance.

Abbreviations: UPDRS: Unified Parkinson's disease rating scale; NMSS: Non-motor symptoms assessment scale

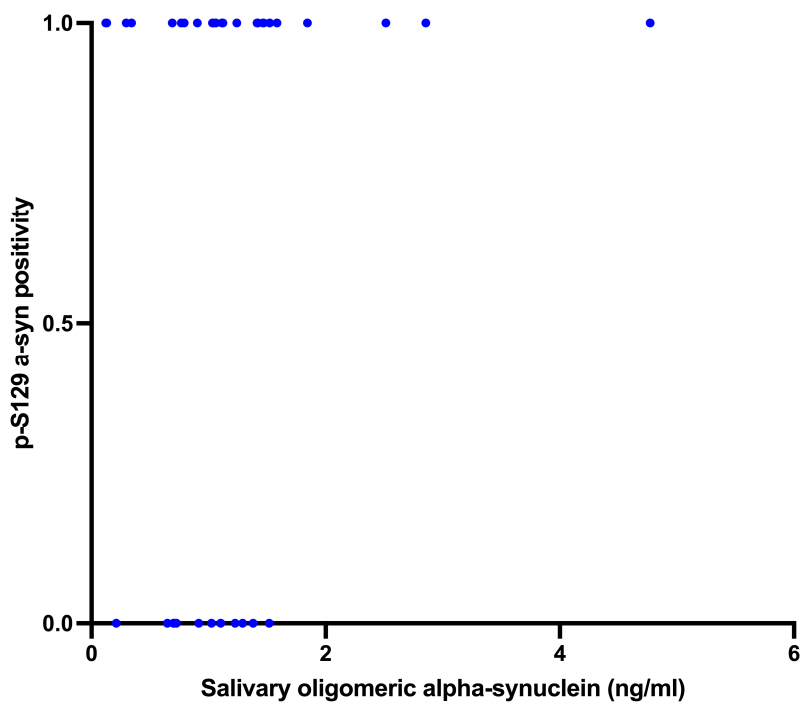

**Figure S3.** Scatter plot illustrating the relationship between salivary oligomeric alpha synuclein (expressed in ng/ml) and skin positivity of p-S129 alpha synuclein

| Model | Variable                                                              | Estimate (odd ratios) | 95% CI (profile likelihood) | p value | R squared | AUC    | Negative predictive power (%) | Positive predictive power (%) |
|-------|-----------------------------------------------------------------------|-----------------------|-----------------------------|---------|-----------|--------|-------------------------------|-------------------------------|
| 1     | Gender (M:1; F:0)                                                     | 2,169                 | 0,6408 to 7,505             | 0,0003  | 0,2821    | 0,7752 | 78,95                         | 79,07                         |
|       | Age                                                                   | 1,080                 | 1,026 to 1,153              |         |           |        |                               |                               |
|       | Oligomeric alpha syn saliva (ng/ml)                                   | 2,093                 | 0,8700 to 6,397             |         |           |        |                               |                               |
| 2     | Gender (M:1; F:0)                                                     | 1,685                 | 0,4131 to 6,882             | <0,0001 | 0,4302    | 0,8750 | 68,18                         | 77,50                         |
|       | Age                                                                   | 1,082                 | 1,022 to 1,169              |         |           |        |                               |                               |
|       | Skin p-S129 alpha synuclein positivity                                | 17,29                 | 3,748 to 133,7              |         |           |        |                               |                               |
| 3     | Gender (M:1; F:0)                                                     | 1,993                 | 0,4848 to 8,315             | <0,0001 | 0,4434    | 0,8487 | 78,26                         | 84,62                         |
|       | Age                                                                   | 1,059                 | 1,001 to 1,136              |         |           |        |                               |                               |
|       | Youden's index-based positivity of salivary alpha synuclein oligomers | 12,68                 | 3,318 to 56,23              |         |           |        |                               |                               |
| 4     | Gender (M:1; F:0)                                                     | 1,264                 | 0,2175 to 6,812             | <0,0001 | 0,6139    | 0,9095 | 100,0                         | 86,36                         |
|       | Age                                                                   | 1,062                 | 0,9660 to 1,197             |         |           |        |                               |                               |
|       | Skin p-S129 alpha synuclein positivity                                | 34,08                 | 4,807 to 755,7              |         |           |        |                               |                               |
|       | Youden's index-based positivity of salivary alpha synuclein oligomers | 28,90                 | 4,415 to 578,6              |         |           |        |                               |                               |

**Table S1.** Age and gender – adjusted logistic regression models
